# Supplementary material for: Maternal Preconception Glucose Homeostasis and Insulin Resistance Are Associated with Singleton and Twin Birthweight of Neonates Conceived by PCOS Women Undergoing IVF/ICSI Cycles
Source: MDPI journal article supplement (doi:10.3390/jcm12113863), 2023-06-05
Supplement: s1 [file s1]

**Table S1.** Adjusted mean (95% CI) for neonatal birthweight by glucose metabolism indicators among PCOS women undergoing their first IVF/ICSI cycles<sup>a</sup>.

| Glucose metabolism indicators | Mean birthweight (95% CI)        |                            |
|-------------------------------|----------------------------------|----------------------------|
|                               | Singletons <sup>b</sup><br>N=190 | Twins <sup>c</sup><br>N=79 |
| <b>FPG</b>                    |                                  |                            |
| T1                            | 2979 (2861, 3097)                | 2353 (2209, 2497)          |
| T2                            | 2919 (2795, 3043)                | 2318 (2154, 2482)          |
| T3                            | 2818 (2683, 2953)                | 2305 (2115, 2494)          |
| <i>P</i> for trend            | 0.04                             | 0.49                       |
| <b>2hPG</b>                   |                                  |                            |
| T1                            | 2996 (2868, 3123)                | 2319 (2163, 2475)          |
| T2                            | 2891 (2775, 3006)                | 2432 (2288, 2576)          |
| T3                            | 2856 (2721, 2991)                | 2250 (2091, 2410)          |
| <i>P</i> for trend            | 0.08                             | 0.44                       |
| <b>FPI</b>                    |                                  |                            |
| T1                            | 2929 (2800, 3058)                | 2360 (2195, 2525)          |
| T2                            | 2951 (2827, 3076)                | 2346 (2195, 2498)          |
| T3                            | 2859 (2726, 2991)                | 2285 (2119, 2451)          |
| <i>P</i> for trend            | 0.42                             | 0.35                       |
| <b>2hPI</b>                   |                                  |                            |
| T1                            | 2960 (2834, 3085)                | 2271 (2110, 2432)          |
| T2                            | 2886 (2767, 3005)                | 2384 (2225, 2543)          |
| T3                            | 2895 (2757, 3033)                | 2342 (2177, 2507)          |
| <i>P</i> for trend            | 0.41                             | 0.30                       |
| <b>HbA1c</b>                  |                                  |                            |
| T1                            | 2980 (2861, 3098)                | 2294 (2148, 2441)          |
| T2                            | 2929 (2806, 3052)                | 2297 (2151, 2442)          |
| T3                            | 2814 (2681, 2947)                | 2476 (2291, 2661)          |
| <i>P</i> for trend            | 0.04                             | 0.07                       |
| <b>HOMA2-IR</b>               |                                  |                            |
| T1                            | 2928 (2798, 3057)                | 2364 (2194, 2535)          |
| T2                            | 2930 (2807, 3053)                | 2297 (2144, 2449)          |
| T3                            | 2879 (2740, 3017)                | 2341 (2159, 2524)          |
| <i>P</i> for trend            | 0.58                             | 0.71                       |
| <b>Gutt Index</b>             |                                  |                            |
| T3                            | 2975 (2844, 3105)                | 2314 (2164, 2464)          |
| T2                            | 2885 (2767, 3003)                | 2441 (2287, 2594)          |
| T1                            | 2885 (2748, 3023)                | 2257 (2104, 2411)          |
| <i>P</i> for trend            | 0.28                             | 0.58                       |
| <b>QUICKI</b>                 |                                  |                            |
| T3                            | 2947 (2820, 3073)                | 2363 (2197, 2530)          |
| T2                            | 2944 (2817, 3071)                | 2328 (2168, 2488)          |

|                    |                   |                   |
|--------------------|-------------------|-------------------|
| T1                 | 2844 (2706, 2982) | 2294 (2122, 2467) |
| <i>P</i> for trend | 0.27              | 0.37              |

---

<sup>a</sup> Adjusted for preconception BMI (continuous), duration of infertility (continuous), ovarian stimulation regimen, gestational age, and delivery mode.

<sup>b</sup> Based on generalized linear models.

<sup>c</sup> Based on generalized estimating equations.

**Table S2.** Regression coefficients (95% CI) for neonatal birthweight by glucose metabolism indicators among PCOS women with preconception BMI  $\geq 18.5\text{kg/m}^2$  undergoing their first IVF/ICSI cycles<sup>a</sup>.

| Glucose metabolism indicators | $\beta$ (95% CI)<br>Singletons <sup>b</sup><br>N=186 | Twins <sup>c</sup><br>N=77 |
|-------------------------------|------------------------------------------------------|----------------------------|
| <b>FPG</b>                    |                                                      |                            |
| T1                            | Ref.                                                 | Ref.                       |
| T2                            | -53.56 (-200.27, 93.15)                              | -31.15 (-180.92, 118.60)   |
| T3                            | -155.59 (-310.47, -0.72)                             | -43.09 (-189.01, 102.80)   |
| <i>P</i> for trend            | 0.05                                                 | 0.54                       |
| <b>2hPG</b>                   |                                                      |                            |
| T1                            | Ref.                                                 | Ref.                       |
| T2                            | -81.21 (-230.24, 67.80)                              | 137.27 (-12.73, 287.30)    |
| T3                            | -122.86 (-281.68, 36.00)                             | -53.41 (-209.98, 103.20)   |
| <i>P</i> for trend            | 0.13                                                 | 0.54                       |
| <b>FPI</b>                    |                                                      |                            |
| T1                            | Ref.                                                 | Ref.                       |
| T2                            | 45.30 (-110.90, 201.50)                              | -2.52 (-166.41, 161.40)    |
| T3                            | -54.78 (-227.65, 118.10)                             | -69.72 (-224.55, 85.10)    |
| <i>P</i> for trend            | 0.52                                                 | 0.38                       |
| <b>2hPI</b>                   |                                                      |                            |
| T1                            | Ref.                                                 | Ref.                       |
| T2                            | -65.65 (-213.32, 82.00)                              | 136.26 (-5.59, 278.10)     |
| T3                            | -56.09 (-220.13, 108.00)                             | 88.43 (-60.86, 237.70)     |
| <i>P</i> for trend            | 0.48                                                 | 0.22                       |
| <b>HbA1c</b>                  |                                                      |                            |
| T1                            | Ref.                                                 | Ref.                       |
| T2                            | -50.66 (-192.54, 91.22)                              | 18.88 (-118.18, 155.90)    |
| T3                            | -151.24 (-306.49, 4.01)                              | 196.01 (21.68, 370.30)     |
| <i>P</i> for trend            | 0.06                                                 | 0.04                       |
| <b>HOMA2-IR</b>               |                                                      |                            |
| T1                            | Ref.                                                 | Ref.                       |
| T2                            | 21.99 (-132.41, 176.40)                              | -58.77 (-222.17, 104.60)   |
| T3                            | -37.19 (-216.52, 142.10)                             | -17.85 (-173.14, 137.40)   |
| <i>P</i> for trend            | 0.69                                                 | 0.77                       |
| <b>Gutt Index</b>             |                                                      |                            |
| T3                            | Ref.                                                 | Ref.                       |
| T2                            | -82.10 (-233.74, 69.50)                              | 153.76 (6.11, 301.40)      |
| T1                            | -81.97 (-249.65, 85.70)                              | -41.63 (-186.04, 102.80)   |
| <i>P</i> for trend            | 0.33                                                 | 0.71                       |
| <b>QUICKI</b>                 |                                                      |                            |
| T3                            | Ref.                                                 | Ref.                       |
| T2                            | 16.57 (-137.68, 170.80)                              | -28.33 (-200.97, 144.30)   |

|                    |                         |                         |
|--------------------|-------------------------|-------------------------|
| T1                 | −92.14 (−270.10, 85.80) | −63.24 (−216.29, 89.80) |
| <i>P</i> for trend | 0.33                    | 0.42                    |

<sup>a</sup> Adjusted for preconception BMI (continuous), duration of infertility (continuous), ovarian stimulation regimen, gestational age, and delivery mode.

<sup>b</sup> Based on generalized linear models.

<sup>c</sup> Based on generalized estimating equations.

**Table S3.** Regression coefficients (95% CI) for neonatal birthweight by glucose metabolism indicators among PCOS women undergoing their first stimulated IVF/ICSI cycles<sup>a</sup>.

| <b>Glucose metabolism indicators</b> | <b><math>\beta</math> (95% CI)<br/>Singletons<sup>b</sup><br/>N=182</b> | <b>Twins<sup>c</sup><br/>N=77</b> |
|--------------------------------------|-------------------------------------------------------------------------|-----------------------------------|
| <b>FPG</b>                           |                                                                         |                                   |
| T1                                   | Ref.                                                                    | Ref.                              |
| T2                                   | −59.50 (−209.91, 90.90)                                                 | −37.24 (−186.53, 112.10)          |
| T3                                   | −141.60 (−303.14, 19.90)                                                | −24.73 (−170.69, 121.20)          |
| <i>P</i> for trend                   | 0.09                                                                    | 0.69                              |
| <b>2hPG</b>                          |                                                                         |                                   |
| T1                                   | Ref.                                                                    | Ref.                              |
| T2                                   | −86.43 (−240.14, 67.30)                                                 | 100.89 (−42.93, 244.70)           |
| T3                                   | −128.72 (−290.93, 33.50)                                                | −92.04 (−246.69, 62.60)           |
| <i>P</i> for trend                   | 0.12                                                                    | 0.27                              |
| <b>FPI</b>                           |                                                                         |                                   |
| T1                                   | Ref.                                                                    | Ref.                              |
| T2                                   | 34.73 (−123.96, 193.40)                                                 | −32.27 (−200.48, 135.90)          |
| T3                                   | −79.30 (−257.35, 98.80)                                                 | −103.46 (−256.46, 49.50)          |
| <i>P</i> for trend                   | 0.39                                                                    | 0.19                              |
| <b>2hPI</b>                          |                                                                         |                                   |
| T1                                   | Ref.                                                                    | Ref.                              |
| T2                                   | −64.23 (−216.68, 88.20)                                                 | 90.87 (−47.03, 228.80)            |
| T3                                   | −80.66 (−249.29, 88.00)                                                 | 53.70 (−97.11, 204.50)            |
| <i>P</i> for trend                   | 0.33                                                                    | 0.44                              |
| <b>HbA1c</b>                         |                                                                         |                                   |
| T1                                   | Ref.                                                                    | Ref.                              |
| T2                                   | −40.40 (−186.23, 105.40)                                                | −24.46 (−159.81, 110.90)          |
| T3                                   | −168.94 (−326.56, −11.30)                                               | 149.21 (−29.42, 327.80)           |
| <i>P</i> for trend                   | 0.04                                                                    | 0.17                              |
| <b>HOMA2-IR</b>                      |                                                                         |                                   |
| T1                                   | Ref.                                                                    | Ref.                              |
| T2                                   | 10.69 (−146.88, 168.30)                                                 | −89.98 (−256.83, 76.90)           |
| T3                                   | −47.73 (−230.45, 135.00)                                                | −52.30 (−204.88, 100.30)          |
| <i>P</i> for trend                   | 0.62                                                                    | 0.45                              |
| <b>Gutt Index</b>                    |                                                                         |                                   |
| T3                                   | Ref.                                                                    | Ref.                              |
| T2                                   | −82.41 (−239.94, 75.10)                                                 | 110.15 (−33.76, 254.10)           |
| T1                                   | −84.21 (−256.21, 87.80)                                                 | −79.04 (−222.05, 64.00)           |
| <i>P</i> for trend                   | 0.33                                                                    | 0.36                              |
| <b>QUICKI</b>                        |                                                                         |                                   |
| T3                                   | Ref.                                                                    | Ref.                              |
| T2                                   | 3.60 (−153.51, 160.70)                                                  | −50.07 (−230.37, 130.20)          |

|                    |                          |                          |
|--------------------|--------------------------|--------------------------|
| T1                 | −100.49 (−283.76, 82.80) | −100.28 (−251.07, 50.50) |
| <i>P</i> for trend | 0.31                     | 0.19                     |

<sup>a</sup> Adjusted for preconception BMI (continuous), duration of infertility (continuous), ovarian stimulation regimen, gestational age, and delivery mode.

<sup>b</sup> Based on generalized linear models.

<sup>c</sup> Based on generalized estimating equations.

**Table S4.** Regression coefficients (95% CI) for neonatal birthweight by glucose metabolism indicators among PCOS women with Day 3 embryos tranferred undergoing their first IVF/ICSI cycles<sup>a</sup>.

| <b>Glucose metabolism indicators</b> | <b><math>\beta</math> (95% CI)<br/>Singletons<sup>b</sup><br/>N=180</b> | <b>Twins<sup>c</sup><br/>N=79</b> |
|--------------------------------------|-------------------------------------------------------------------------|-----------------------------------|
| <b>FPG</b>                           |                                                                         |                                   |
| T1                                   | Ref.                                                                    | Ref.                              |
| T2                                   | -36.70 (-186.69, 113.28)                                                | -34.86 (-183.44, 113.70)          |
| T3                                   | -175.65 (-338.16, -13.14)                                               | -48.13 (-193.74, 97.50)           |
| <i>P</i> for trend                   | 0.04                                                                    | 0.49                              |
| <b>2hPG</b>                          |                                                                         |                                   |
| T1                                   | Ref.                                                                    | Ref.                              |
| T2                                   | -86.92 (-239.91, 66.07)                                                 | 113.31 (-27.58, 254.20)           |
| T3                                   | -129.35 (-294.55, 35.85)                                                | -68.91 (-224.15, 86.30)           |
| <i>P</i> for trend                   | 0.12                                                                    | 0.44                              |
| <b>FPI</b>                           |                                                                         |                                   |
| T1                                   | Ref.                                                                    | Ref.                              |
| T2                                   | 42.77 (-117.95, 203.50)                                                 | -13.46 (-177.19, 150.30)          |
| T3                                   | -60.35 (-238.94, 118.25)                                                | -74.70 (-228.99, 79.60)           |
| <i>P</i> for trend                   | 0.50                                                                    | 0.35                              |
| <b>2hPI</b>                          |                                                                         |                                   |
| T1                                   | Ref.                                                                    | Ref.                              |
| T2                                   | -54.68 (-208.58, 99.23)                                                 | 113.05 (-24.87, 251.00)           |
| T3                                   | -51.87 (-220.91, 117.16)                                                | 71.46 (-76.82, 219.70)            |
| <i>P</i> for trend                   | 0.52                                                                    | 0.30                              |
| <b>HbA1c</b>                         |                                                                         |                                   |
| T1                                   | Ref.                                                                    | Ref.                              |
| T2                                   | -49.67 (-196.71, 97.38)                                                 | 2.10 (-129.80, 134.00)            |
| T3                                   | -154.27 (-314.92, 6.39)                                                 | 181.39 (8.60, 354.20)             |
| <i>P</i> for trend                   | 0.06                                                                    | 0.07                              |
| <b>HOMA2-IR</b>                      |                                                                         |                                   |
| T1                                   | Ref.                                                                    | Ref.                              |
| T2                                   | 18.33 (-140.13, 176.79)                                                 | -67.49 (-230.66, 95.70)           |
| T3                                   | -40.25 (-225.25, 144.75)                                                | -22.90 (-177.09, 131.30)          |
| <i>P</i> for trend                   | 0.69                                                                    | 0.71                              |
| <b>Gutt Index</b>                    |                                                                         |                                   |
| T3                                   | Ref.                                                                    | Ref.                              |
| T2                                   | -79.13 (-235.50, 77.24)                                                 | 126.38 (-15.69, 268.50)           |
| T1                                   | -89.07 (-263.20, 85.06)                                                 | -56.93 (-200.07, 86.20)           |
| <i>P</i> for trend                   | 0.30                                                                    | 0.58                              |
| <b>QUICKI</b>                        |                                                                         |                                   |
| T3                                   | Ref.                                                                    | Ref.                              |
| T2                                   | 10.68 (-147.24, 168.60)                                                 | -35.11 (-208.07, 137.80)          |

|                    |                         |                         |
|--------------------|-------------------------|-------------------------|
| T1                 | −94.98 (−280.21, 90.26) | −69.03 (−221.26, 83.20) |
| <i>P</i> for trend | 0.34                    | 0.37                    |

<sup>a</sup> Adjusted for preconception BMI (continuous), duration of infertility (continuous), ovarian stimulation regimen, gestational age, and delivery mode.

<sup>b</sup> Based on generalized linear models.

<sup>c</sup> Based on generalized estimating equations.
